# Supplementary material for: How to improve the state of the art in metocean measurement datasets
Source: Copernicus journal article supplement (doi:10.5194/wes-5-285-2020), 2020-02-28
Supplement: Supplementary file [file wes-5-285-2020-supplement-title-page.pdf › wes-5-285-2020-supplement-title-page.pdf]

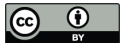

## *Supplement of*

# **How to improve the state of the art in metocean measurement datasets**

**Erik Quaeghebeur and Michiel B. Zaaier**

*Correspondence to:* Michiel B. Zaaier ([m.b.zaayer@tudelft.nl](mailto:m.b.zaayer@tudelft.nl))

- wes-5-285-2020-supplement-title-page.pdf
- outlier-plots
  - FINO1
    - \* FINO1-CA\_Wg.pdf
    - \* FINO1-HTT\_Lf.pdf
    - \* FINO1-HTT\_Lt.pdf
    - \* FINO1-PM\_Ns.pdf
    - \* FINO1-PS\_Ni.pdf
    - \* FINO1-PTB\_Ld.pdf
    - \* FINO1-PYR\_Gs.pdf
    - \* FINO1-UA\_Wg.pdf
    - \* FINO1-UA\_Wr.pdf
    - \* FINO1-WV\_Wr.pdf
  - MMIJ
    - \* MMIJ-CA\_TrueWs.pdf
    - \* MMIJ-CA\_Ws.pdf
    - \* MMIJ-HMP\_Rh.pdf
    - \* MMIJ-HMP\_Tair.pdf
    - \* MMIJ-PD\_Prec.pdf
    - \* MMIJ-PM\_OK.pdf
    - \* MMIJ-PM\_Prec.pdf
    - \* MMIJ-PM\_Synop.pdf
    - \* MMIJ-PM\_amount.pdf
    - \* MMIJ-PM\_intens.pdf
    - \* MMIJ-PM\_qual.pdf
    - \* MMIJ-PM\_visib.pdf
    - \* MMIJ-PTB\_Pair.pdf
    - \* MMIJ-USA\_SSon.pdf

- \* MMIJ-USA\_TrueWsHor.pdf
  - \* MMIJ-USA\_WsHor.pdf
  - \* MMIJ-USA\_WsMag.pdf
  - \* MMIJ-USA\_WsXSon.pdf
  - \* MMIJ-USA\_WsYSon.pdf
  - \* MMIJ-USA\_WsZSon.pdf
  - \* MMIJ-WV\_TrueWd.pdf
  - \* MMIJ-WV\_Wd.pdf
  - \* MMIJ-pseudo\_AirDensity.pdf
- OWEZ

- \* OWEZ-AC\_ma.pdf
- \* OWEZ-AC\_pa.pdf
- \* OWEZ-AWAC\_cd11.pdf
- \* OWEZ-AWAC\_cd7.pdf
- \* OWEZ-AWAC\_cv11.pdf
- \* OWEZ-AWAC\_cv7.pdf
- \* OWEZ-AWAC\_vd.pdf
- \* OWEZ-AWAC\_vh.pdf
- \* OWEZ-AWAC\_vp.pdf
- \* OWEZ-AWAC\_wl.pdf
- \* OWEZ-AWAC\_wt.pdf
- \* OWEZ-CA\_ws.pdf
- \* OWEZ-HMP\_at.pdf
- \* OWEZ-HMP\_rh.pdf
- \* OWEZ-PD\_pl.pdf
- \* OWEZ-RPT\_ap.pdf
- \* OWEZ-ST\_wt.pdf
- \* OWEZ-WM\_hws.pdf
- \* OWEZ-WM\_vws.pdf
- \* OWEZ-WM\_wd.pdf
- \* OWEZ-WV\_wd.pdf

The copyright of individual parts of the supplement might differ from the CC BY 4.0 License.
